# Supplementary material
Source: PubMed Central journal article supplement (PMC6396169)
Supplement: EMBJ-38-e99599-s002.pdf [file EMBJ-38-e99599-s002.pdf]

## Expanded View Figures

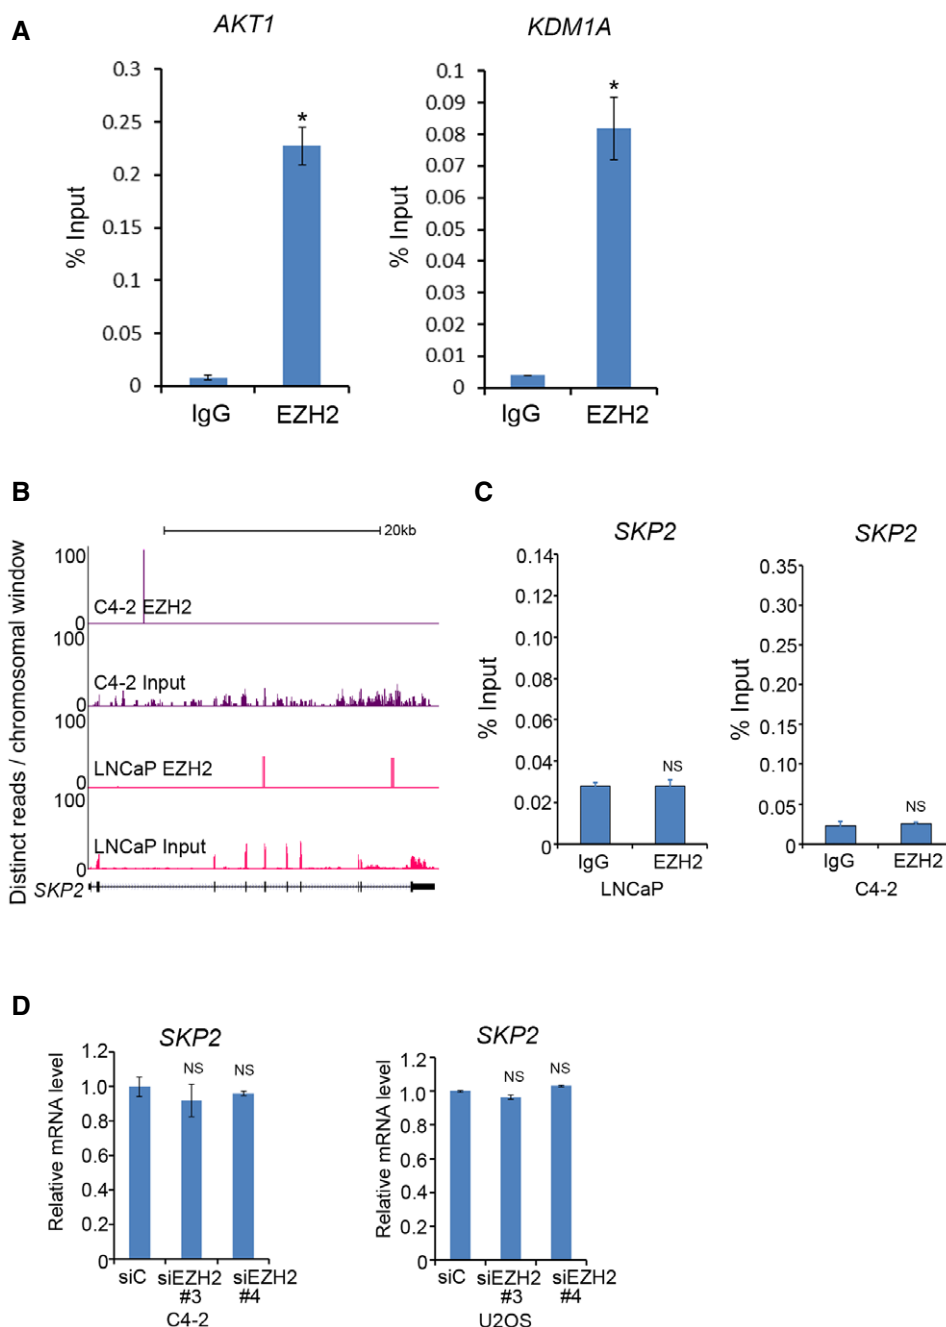

**Figure EV1. Assessment of binding and regulation of mRNAs by EZH2. Related to Fig 1.**

- A RT-qPCR analysis of mRNAs of AKT1 and KDM1A immunoprecipitated by IgG or EZH2 antibody in C4-2 cells. These genes are on the top of the list of mRNAs highly enriched by anti-EZH2 antibody. Data shown are mean values  $\pm$  SD from three replicates. \* $P < 0.01$ .
- B Screen shots from UCSC genome browser showing signal profiles of SKP2 mRNA immunoprecipitated by anti-EZH2 antibody in LNCaP and C4-2 cells. Total RNA was used as the input control of RIP-seq.
- C RIP-qPCR analysis of SKP2 mRNA immunoprecipitated by IgG and anti-EZH2 antibody in LNCaP and C4-2 cells. Data shown are mean values  $\pm$  SD from three replicates.
- D Effect of EZH2 on SKP2 mRNA expression. C4-2 prostate cancer and U2OS osteosarcoma cell lines were transfected with non-specific control (siC) or two independent EZH2-specific siRNAs. 48-h post-transfection expression of SKP2 mRNA was measured by RT-qPCR. Error bar showing SD from three replicates. NS, no significance.

**Figure EV2. EZH2 regulation of expression of p53 downstream target genes. Related to Fig 1.**

- A EZH2 fragment binding to p53 5'UTR determined by RNA EMSA. Different doses of GST-EZH2 recombinant proteins (GST-EZ3) were incubated with 1  $\mu$ g of biotin-labeled p53 mRNA 5'UTR probe for 1 h on ice. The RNA-protein complex (RPC) was detected by PAGE followed by immune blotting with HRP-conjugated streptavidin.
- B pcDNA3.1-based expression vectors for Flag-p53 FL and/or Flag-p53/47 in combination with empty vector or Myc-EZH2 were transfected into PC3 cells. Forty-eight hours after transfection cells were lysed in RIPA buffer for Western blots with indicated antibodies. ERK2, a loading control.
- C PC3 cells were transfected with indicated plasmids. Forty-eight hours after transfection cells were lysed for Western blot.
- D Diagram of the map for *pp53-5'UTR-F/Rluc* vector. F means firefly luciferase gene. R means Renilla luciferase gene.
- E, F Expression of mRNAs for *p21<sup>CIP1</sup>*, *BAX*, and *MDM2* genes was measured by RT-qPCR in C4-2 (E) and U2OS (F) cells 48 h after transfection with non-specific control (siC) or two independent EZH2-specific siRNAs. *GAPDH* was used as internal control. Data shown are mean values  $\pm$  SD (error bar) from three replicates. \* $P < 0.01$  comparing EZH2 siRNA-transfected with siC-transfected cells.
- G C4-2 cells were transfected with indicated plasmids for 24 h, and cells were harvested for co-IP and Western blot analysis. Asterisks indicate different EED isoforms.
- H-J C4-2 cells treated with vehicle (DMSO) or different concentrations (5 and 20  $\mu$ M) of GSK126 for 24 h were harvested for analysis of expression of p53 mRNA and protein using RT-qPCR and Western blot, respectively (H), mRNA expression of EZH2 repressed genes *DAB2IP* and *BRACHYURY* (I), and EZH2-activated genes *TEME48*, *CKS2*, and *KIAA0101* (J). The *GAPDH* was used as internal control. Data shown are mean values  $\pm$  SD (error bar) from three replicates. \* $P < 0.01$  comparing GSK126-treated with mock-treated cells.

Source data are available online for this figure.

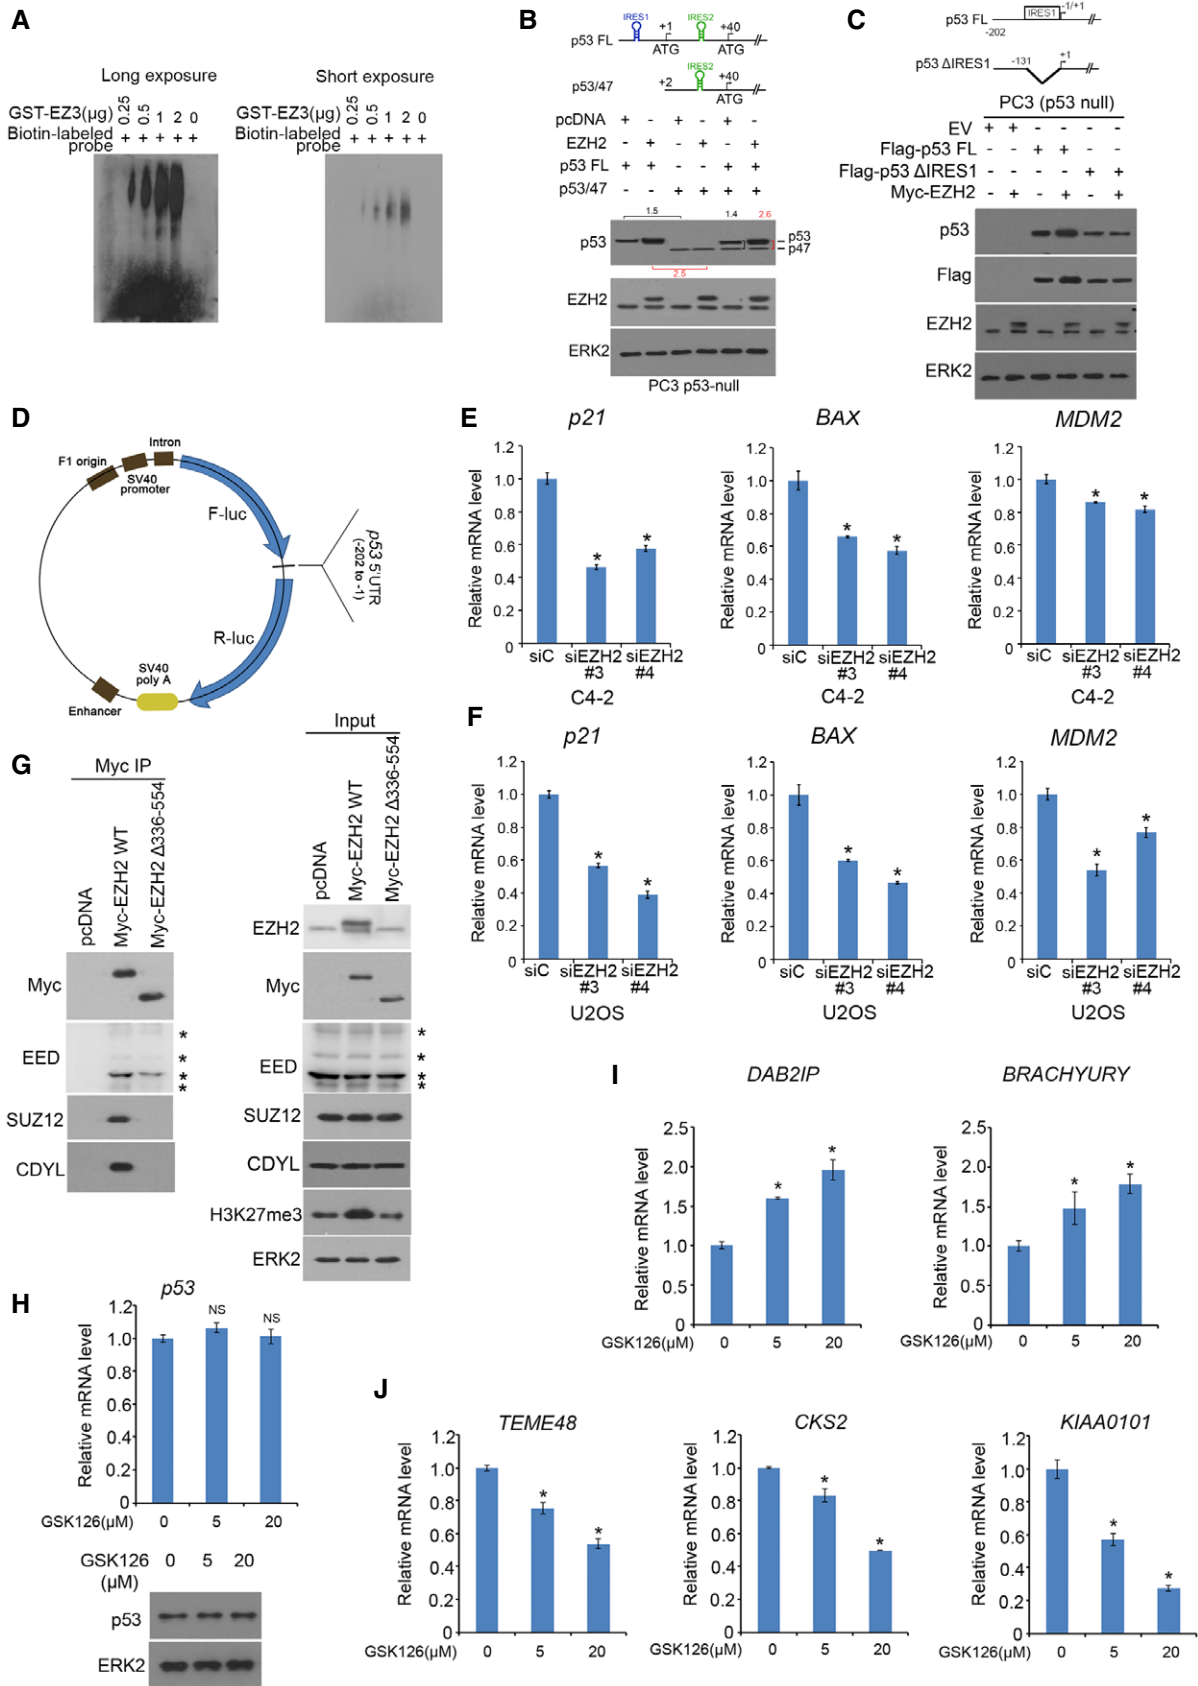

Figure EV2.

**Figure EV3. The effect of the EZH2-specific enzymatic inhibitor GSK126 on p53 mRNA expression and stability. Related to Fig 3.**

- A C4-2 cells transfected with Myc-EZH2 WT for 24 h were lysed for co-IP and Western blot analysis.
- B C4-2 cells were lysed in IP buffer and treated with DNaseI in 37°C for 15 min followed by co-IP and Western blot analysis. Genomic DNA in input samples was assessed by PCR using primers for *TP53* promoter.
- C GST, GST-eIF4G2, and GST-PABP1 proteins were purified from BL21 bacteria. Myc-EZH2 was produced using Quick coupled transcription/translation kit through T7 promoter *in vitro*. p53 full-length (FL) mRNA was transcribed by T7 enzyme *in vitro*. These purified proteins were used for GST pull-down assay in the presence or absence of p53 FL mRNA, followed by Western blot analysis.
- D UV-RIP-qPCR analysis of p53 mRNA immunoprecipitated by IgG, anti-EED, anti-SUZ12, or anti-EZH2 antibody from lysate of C4-2 cells treated with 4SU for 8 h. Data shown are mean values  $\pm$  SD from three replicates. \*\* $P < 0.01$  comparing EZH2 IP with IgG IP. NS, no significance.
- E C4-2 (Left) and VCaP (Right) cells were infected with lentivirus for non-specific control (sh-Control) or two independent EED (or SUZ12)-specific shRNAs for 48 h followed by Western blot analysis. ERK2, a loading control.
- F RNA was extracted from sucrose gradient fractions of C4-2 cell lysate. 40S, 60S, 80S, and polyribosomes were indicated above fraction numbers. A254, absorbance at 254 nm.
- G C4-2 cells were infected with lentivirus for si-control or siEZH2#3 or siEZH2#4 for 48 h followed by RT-PCR analysis of p53 pre-mRNA expression (Left) and ChIP-PCR analysis of Pol II (N20) occupancy (Right).
- H Control or EZH2 knockdown C4-2 cells were treated with cycloheximide (CHX, 50 mg/ml) for different periods of time and harvested for Western blot analysis.  $\beta$ -TUBULIN, a loading control.
- I Control or EZH2 knockdown C4-2 cells were treated with MG132 (20 mg/ml) or chloroquine (CQ 25 mg/ml) for 8 h followed by Western blot analysis.  $\beta$ -TUBULIN, a loading control.
- J Expression of p53 mRNA was measured by RT-qPCR in C4-2 cells 48 h after transfection with non-specific control (siC) or two independent EZH2-specific siRNAs. GAPDH was used as internal control. Data shown are mean values  $\pm$  SD from three replicates. \* $P < 0.01$ .
- K Expression of p53 mRNA was measured by RT-qPCR in C4-2 cells 48 h after transfection with non-specific control (siC) or EZH2-specific siRNAs in combination with or without empty vector (EV) or siRNA-resistant Myc-EZH2 wild-type (WT) or mutants. GAPDH was used as an internal control. Data shown are mean values  $\pm$  SD from three replicates. \* $P < 0.01$ .
- L, M p53 (L) and SKP2 (M) mRNA stability was assessed in C4-2 and U2OS cells transfected with non-specific siRNA (siC) or EZH2-specific siRNA followed by actinomycin D treatment. GAPDH was used as internal control. Mean values  $\pm$  SD from three replicates. \* $P < 0.01$ .

Source data are available online for this figure.

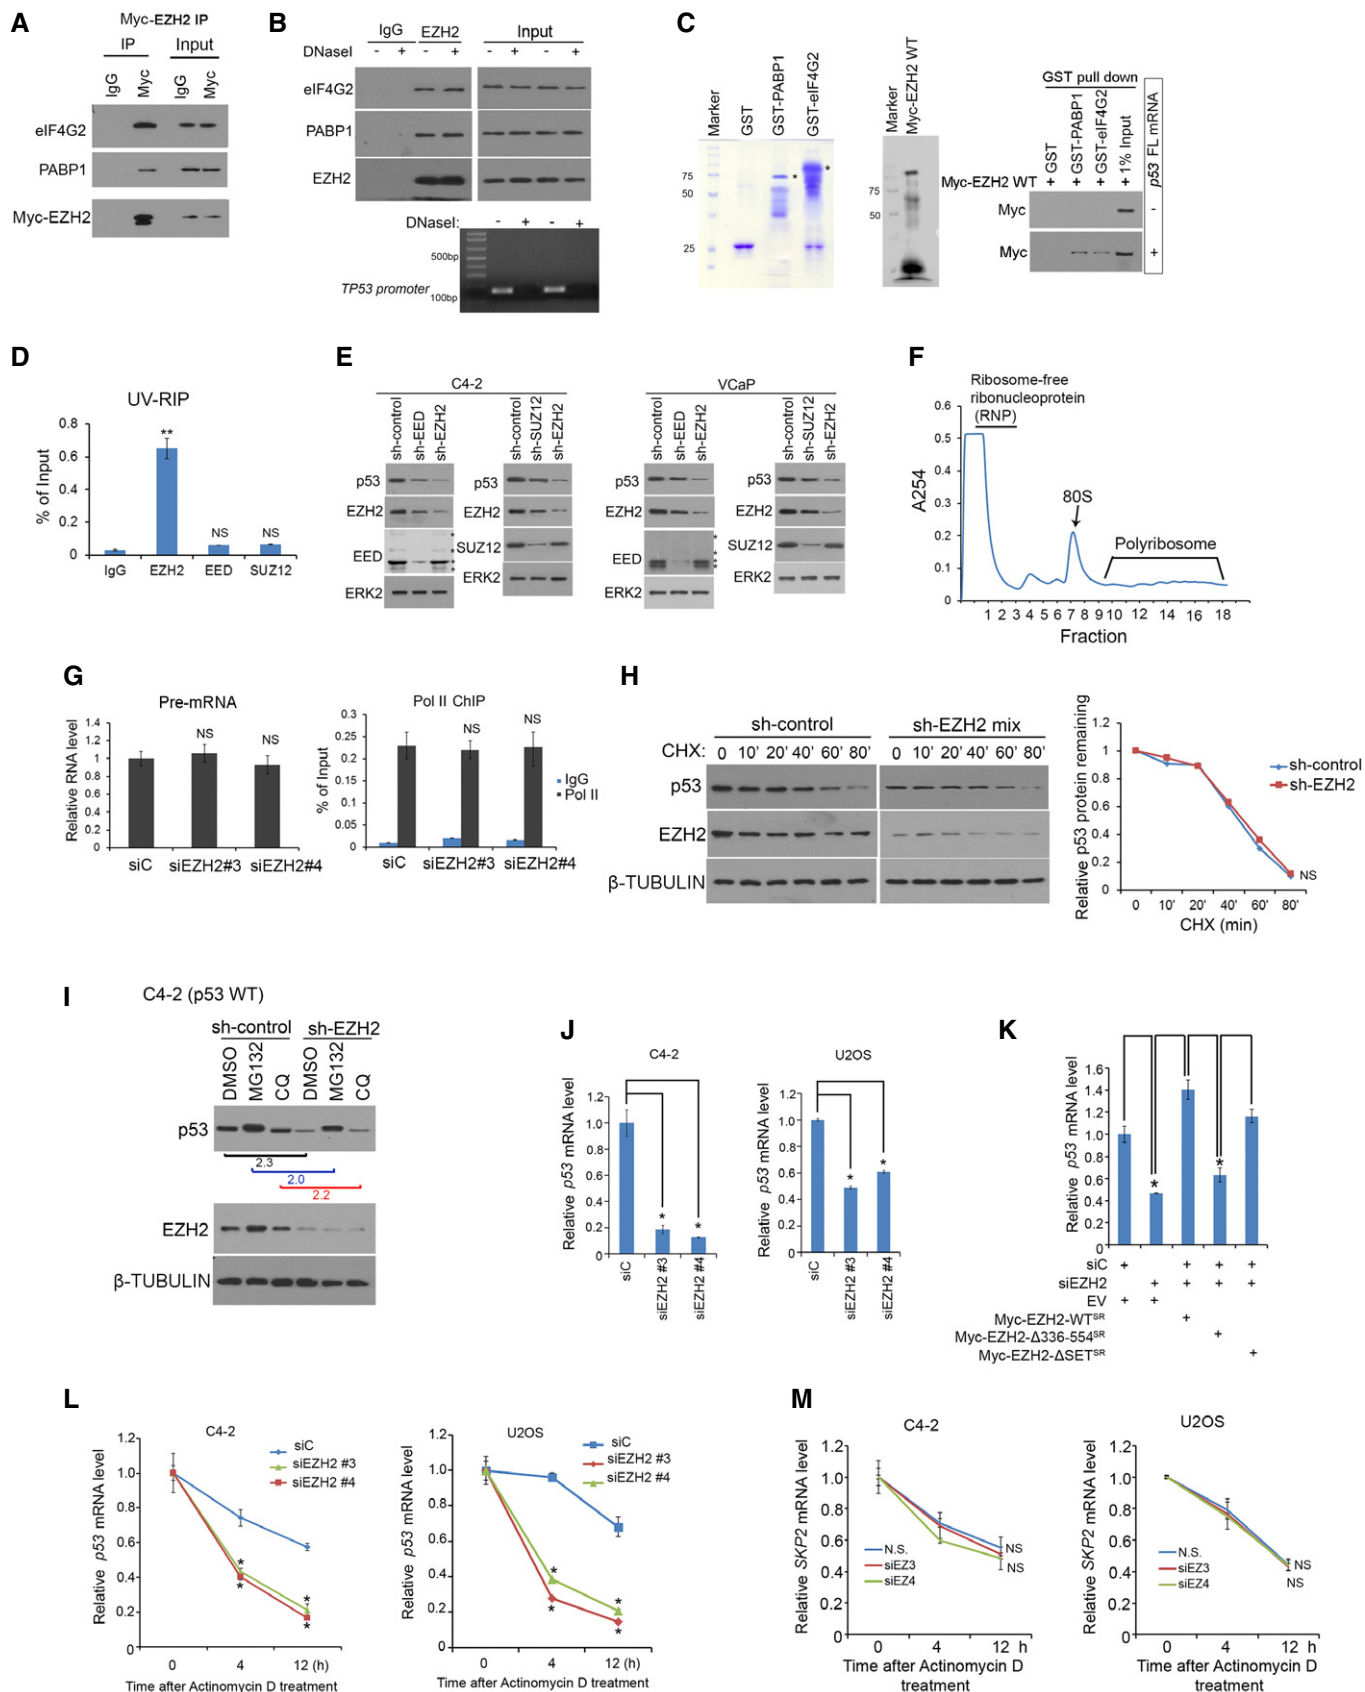

Figure EV3.

**A**

Human <sup>-202</sup> GATGGGATTG GGGTTTTCCC CTCCCATGTG CTCAAGACTG GCGCTAAAAG TTTTGGACTT CTCAAAAGTC TAGAGCCACC  
 Mouse <sup>-157</sup> TTT CCCCTCCCAC GTGCTCACCC TGGCTAAAAGT TCTGTAGCTT C-----AGTT CATTGGGACC  
 Rat <sup>-131</sup> TCTGAAGCTC C-----AGTT CATTGGGACT

Human -GTCCAGGGA GCAGGTAGCT GCTGGGCTCC GGGGACACTT TGGGTTCCGG CTGGGAGCGT GCT---TTCC ACGACGGTGA  
 Mouse -ATCCTGGCT GTAGGTAGCG ACTACAGTTA GGGGGCACCT AGCAITCAGG CCCTCATCCT CCTCCTTCCC AGCAGGGTGT  
 Rat TATCCTTGCT ATAGGTAGCG ACTACAGTTA GGGGGTACCT GGCATCCGGG CCCGCACCCT ACT---TCCC AGCAGGGTGT

Human CACGCTTCCC TGGATTGGCA GCCAGACTGC CTTCCGGGTC ACTGCC -1  
 Mouse CACGCTTCTC CGAA--GACT GG -1  
 Rat CACGCTCCCC TGAA--GACT GGATAACTGT C -1

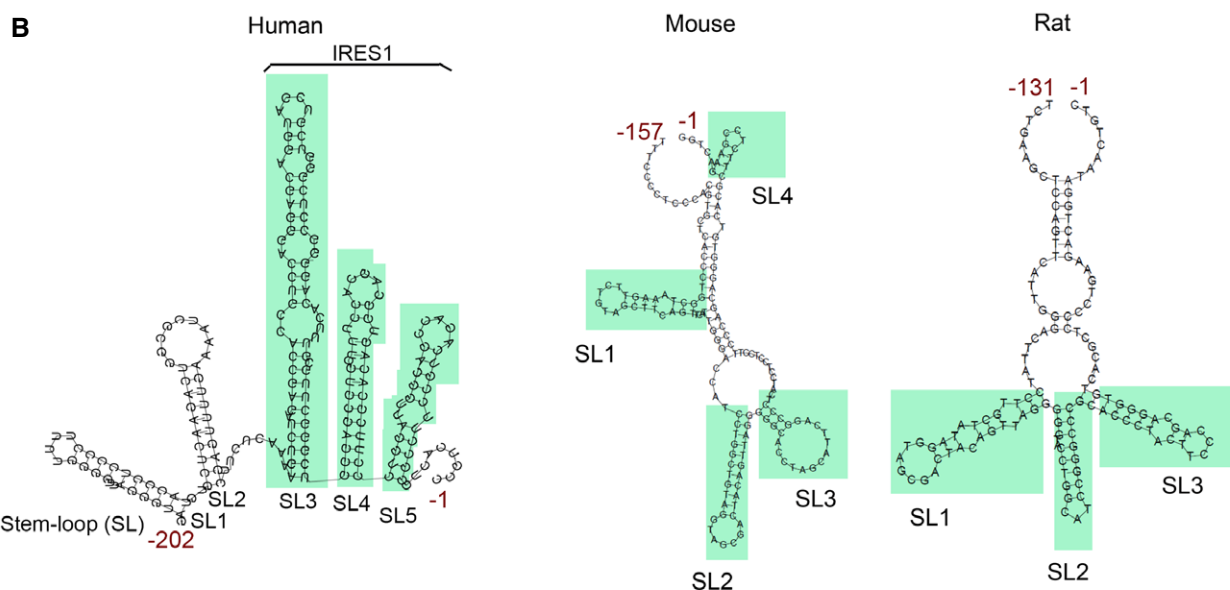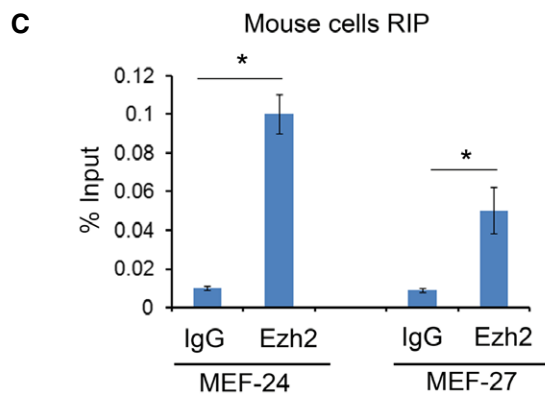

**Figure EV4. Ezh2 binds to p53 mRNA in murine cells. Related to Fig 4.**

A Alignment of nucleotide sequence of the 5'UTR of p53 mRNA of human, mouse, and rat. The conserved nucleotides are highlighted in yellow.

B The predicted secondary structure of 5'UTR of p53 mRNA of human, mouse, and rat. SL, stem loop.

C RIP assay showing p53 mRNA immunoprecipitated by anti-EZH2 antibody in MEF-27 and MEF-24 cells as measured by RT-qPCR. Data shown as means ± SD (n = 3).

\*P < 0.01.

**Figure EV5. Positive correlation between EZH2 and p53 mRNA expression in different types of human cancer. Related to Figs 5 and 6.**

- A–H Analysis of correlation between EZH2 and p53 mRNA expression in published datasets obtained from different types of human cancer. The correlation coefficient (Pearson's  $r$ ) and  $P$  value were shown in each figure.
- I Correlation analysis of EZH2 and p53 (WT or mutant) mRNA level in primary prostate cancer specimens of the TCGA cohort.
- J–M Western blot and RT–qPCR analysis of p53 protein and mRNA expression in VCaP (J), DU145 (K), glioblastoma U251 (L), and T98 (M) cells at 48 h after transfected with non-specific control (siC) or EZH2-specific siRNAs. GAPDH was used as internal control. Data shown are mean values  $\pm$  SD from three replicates.  $*P < 0.01$  comparing EZH2 siRNA-transfected with siC siRNA-transfected cells.
- N PC3 cells were transfected with plasmids for R273H (Left)- or R248W (Right)-mutated Flag-tagged p53 full-length or  $\Delta$ IRES1 mutant for 48 h followed by Western blots.
- O Control or EZH2 knockdown VCaP cells were treated with 100  $\mu$ M 4-thiouridine (4SU) for 8 h for Western blot analysis and UV-RIP assay followed by RT–qPCR measurement of p53 mRNA immunoprecipitated by IgG or anti-EZH2 antibody. Data shown as means  $\pm$  SD ( $n = 3$ ).  $**P < 0.01$ .
- P Expressions of p53, Myc-tagged EZH2, H3K27me3, and total EZH2 protein were measured by Western blot in VCaP cells infected lentivirus for sh-control or p53-specific shRNAs in combination with Myc-tagged empty vector (EV) or EZH2 truncation mutants. ERK2 was used as the loading control. Asterisks indicate that Myc-tagged EZH2 $\Delta$ 336–554 protein cannot be recognized by the anti-EZH2 antibody.
- Q VCaP cells were infected lentivirus as in (P) and plated into 6-well plate for colony formation assay. At 14 days after plating, colonies were fixed, stained, photographed (Left), and quantified (Right).  $*P < 0.01$ ; NS, no significance.
- R VCaP cells expressing p53 R248W mutant were transfected indicated plasmids followed by Western blot analysis (Left) and MTS assay (Right). Data are means  $\pm$  SD from experiments with three replicates.  $***P < 0.001$ . ERK2 was used as a loading control.
- S VCaP cells were infected with lentivirus for indicated shRNAs or WT EZH2 or mutants for 48 h followed by colony formation assay (Left and Middle) and Western blot (Right). Data are means  $\pm$  SD from experiments with three replicates.  $**P < 0.01$ , NS, no significance. ERK2 was used as a loading control.

Source data are available online for this figure.

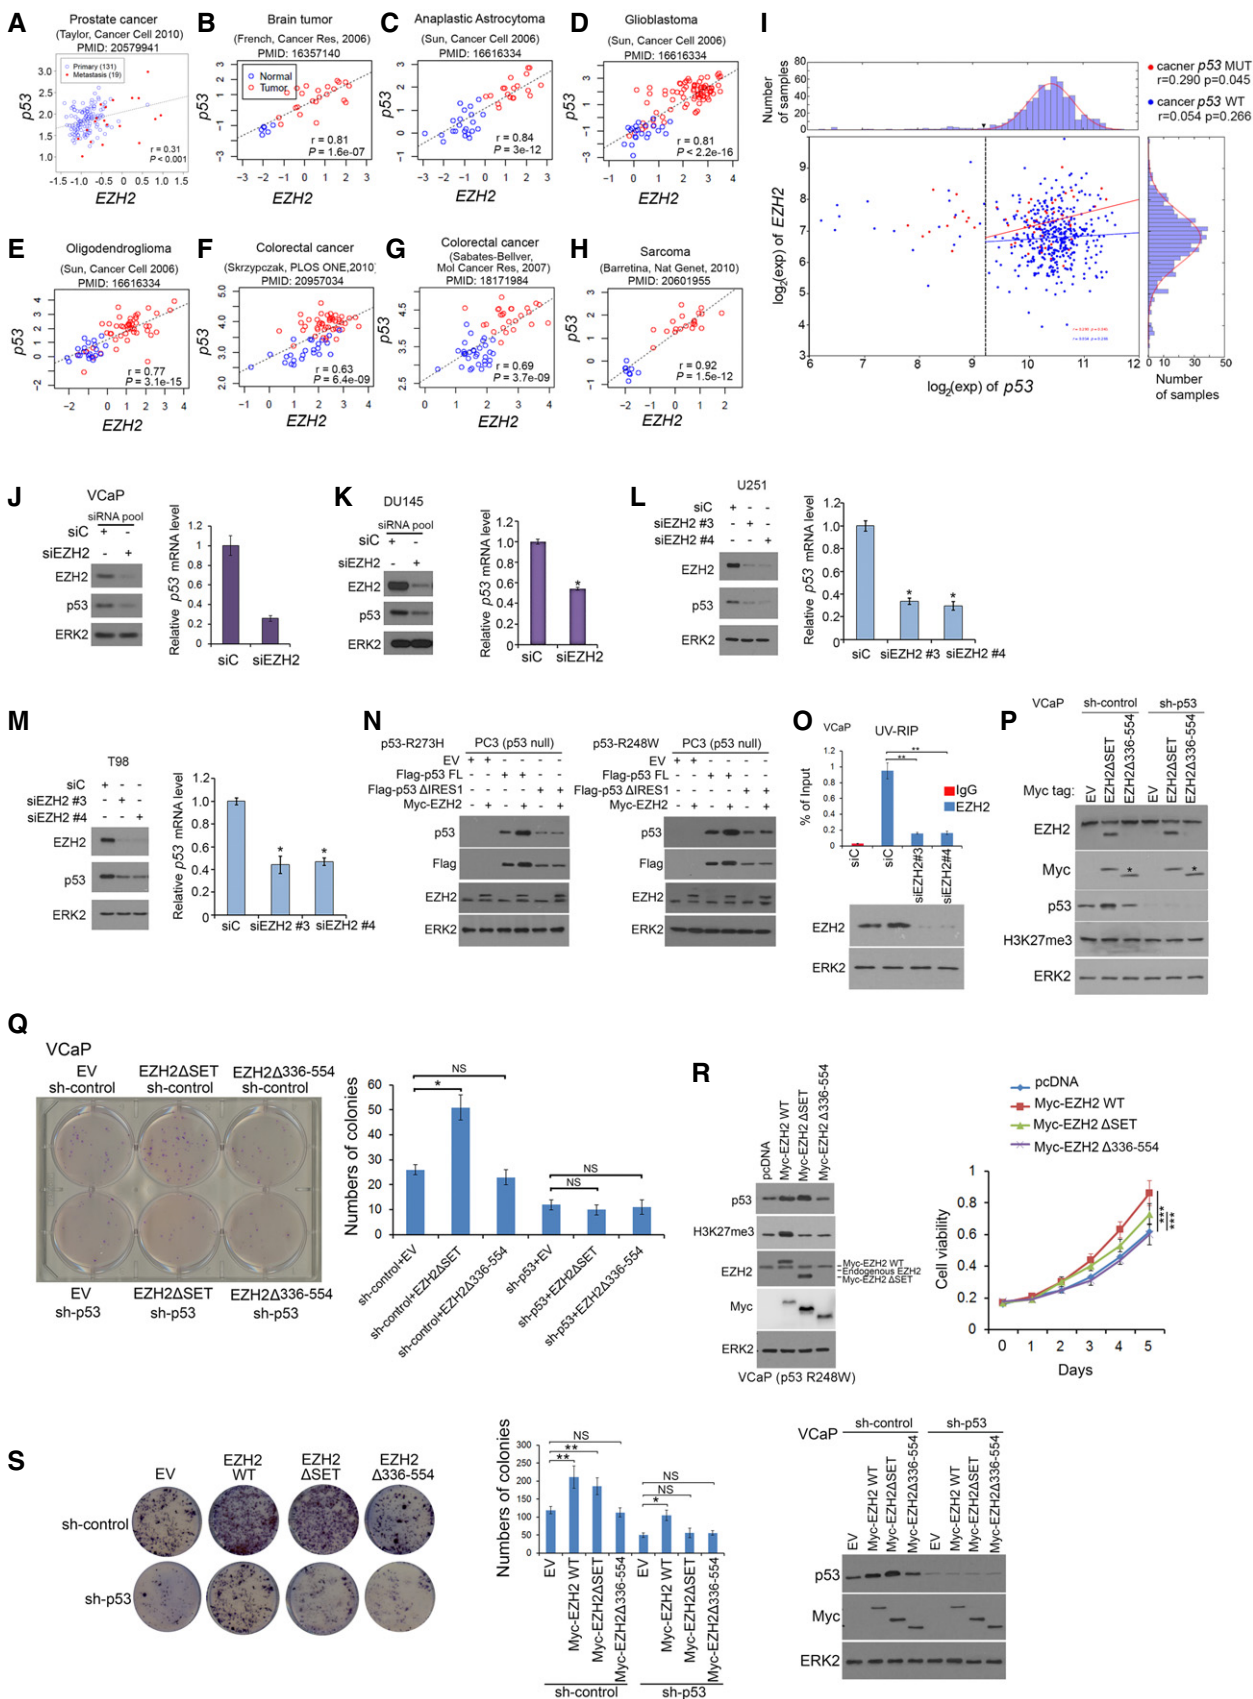

Figure EV5.
